# Supplementary material
Source: PubMed Central journal article supplement (PMC5441930)
Supplement: NIHMS845500-supplement.pdf [file NIHMS845500-supplement.pdf]

Table S1. The primers used for QRT-PCR analyses.

| Gene           | Forward primer (5'–3')   | Reverse primer (5'–3')     |
|----------------|--------------------------|----------------------------|
| GAPDH          | ACCTGCCAAGTATGATGACATCA  | GGTCCTCAGTGTAGCCCAAGAT     |
| IL-1 $\alpha$  | TCTGCCATTGACCATCTC       | ATCTTCCCGTTGCTTGAC         |
| IL-1 $\beta$   | GCAACTGTTCTGAACTCAACT    | ATCTTTTGGGGTCCGTCAACT      |
| IL-4           | GGTCTCAACCCCAAGTAGT      | GCCGATGATCTCTCTCAAGTGAT    |
| IL-5           | GGGCTTCCTGCTCCTATCTA     | CAGTCATGGCACAGTCTGAT       |
| IL-6           | TAGTCCTTCTACCCCAATTTCC   | TTGGTCCTTAGCCACTCCTTC      |
| IL-10          | CAGGGATCTTAGCTAACGAAA    | GCTCAGTGAATAAATAGAATGGGAAC |
| IL-12 $\beta$  | AGACATGGAGTCATAGGCTCTG   | CCATTTTCTTCTTGTGGAGCA      |
| IL-17A         | TCATCTGTGTCTCTGATGCTGTTG | TCGCTGCCTTCACTGT           |
| IL-17F         | TCGCCATTGAGCAAGAAATCC    | CACAGGTGCAGCCAACTTTTA      |
| IL-18          | GACTCTTGCCTCAACTTCAAGG   | CAGGCTGTCTTTTGTCAACGA      |
| IL-19          | AAATCTCTGGAGCGATGTCAG    | GGCTAAAAGTATGTTTCAGTTCTCC  |
| IL-22          | GCTCAGCTCCTGTCACATCA     | AGCTTCTTCTCGCTCAGACG       |
| IL-23          | AGCAACTTCACACCTCCCTAC    | ACTGCTGACTAGAACTCAGGC      |
| IL-24          | GCCCAGTAAGGACAATTCCA     | ATTTCTGCATCCAGGTCAGG       |
| IFN $\gamma$   | GAACTGGCAAAAGGATGGTGA    | TGTGGGTTGTTGACCTCAAAC      |
| TGF $\beta$    | CCGCAACAACGCCATCTATG     | CTCTGCACGGACAGCAAT         |
| TGF $\beta$ R1 | CATTCACCACCGTGTGCCAAATGA | ACCTGATCCAGACCCTGATGTTGT   |
| TNF $\alpha$   | CAGGCGGTGCCTATGTCTC      | TTGGTGGTTTGTGAGTGTGAG      |
| CXCL-1         | ACCCAAACCGAAGTCATAGC     | TGGGGACACCTTTTAGCATC       |
| CXCL-2         | AGTTTGCCTTGACCCTGAAG     | CTTTGGTTCTTCCGTTGAGG       |
| CXCL-9         | GAACGGAGATCAAACCTGCCT    | TGTAGTCTTCTTGAACGACGA      |
| Amyloid A      | AGTCTGGGCTGCTGAGAAAA     | GGCAGTCCAGGAGGTCTGTA       |

Table S2. List of Antibodies

| Cell Types        | Markers | Primary Antibodies            |                | Secondary Antibodies |                |
|-------------------|---------|-------------------------------|----------------|----------------------|----------------|
|                   |         | Sources                       | Concentrations | Sources              | Concentrations |
| Helper T cells    | CD4     | Abcam(ab25475)(Rat)           | 1:100          | CWBio(CW0169S)(Goat) | 1:200          |
| Cytotoxic T cells | CD8     | Abcam(ab25478)(Rat)           | 1:100          | CWBio(CW0169S)(Goat) | 1:200          |
| Neutrophils       | Ly6G    | Biolengend(108401)(Rat)       | 1:300          | CWBio(CW0169S)(Goat) | 1:200          |
| Langerhans cells  | CD207   | Dendritics(DDX0362P-100)(Rat) | 1:150          | CWBio(CW0169S)(Goat) | 1:200          |

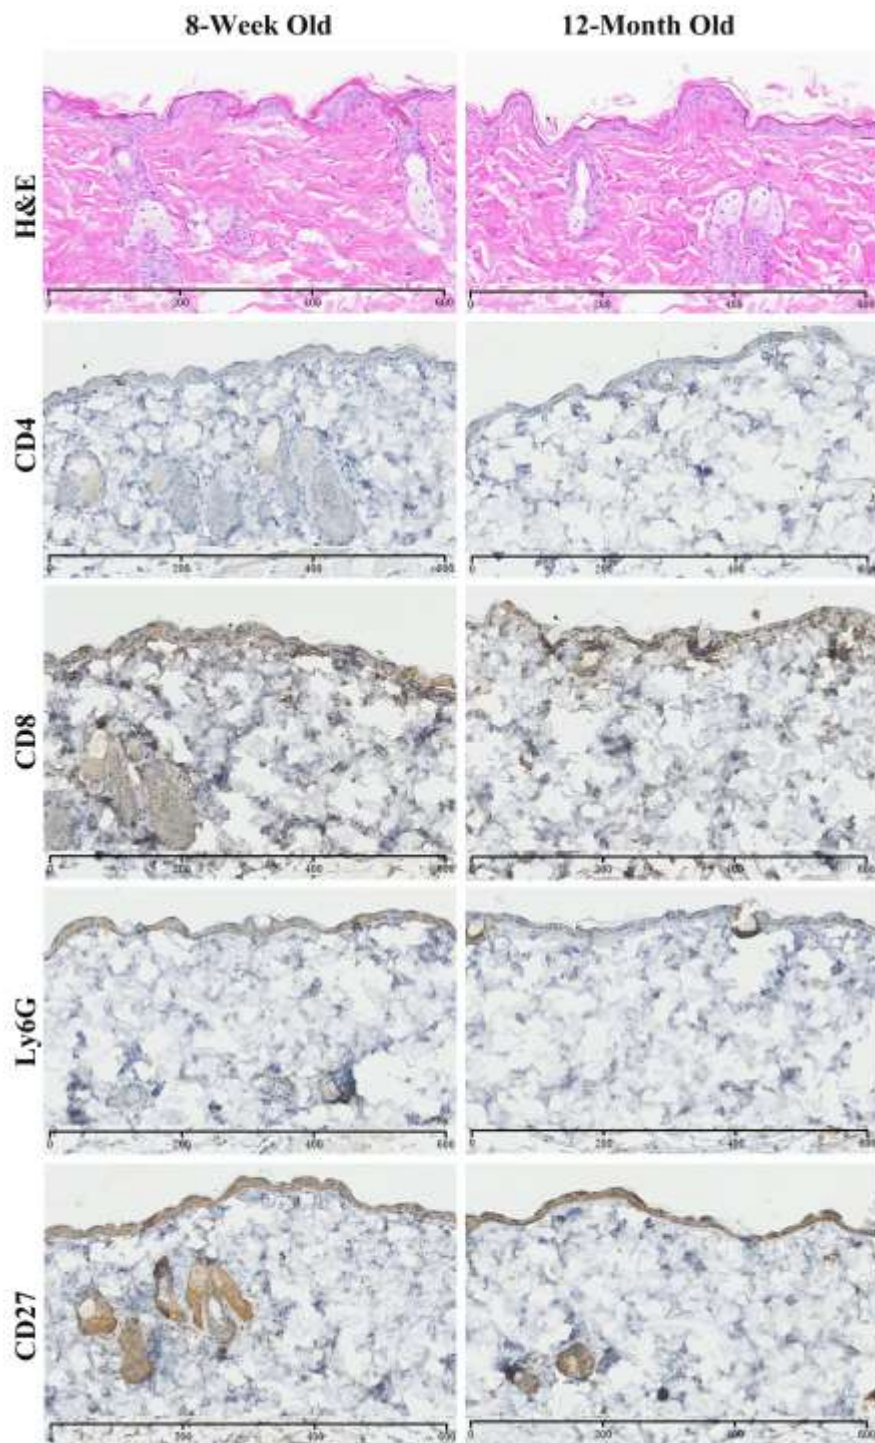

**Supplemental Figure 1. Comparison of Cutaneous Infiltration of Inflammatory Cells in Young vs. Aged Mice.** Skin biopsies were taken from 8-week and 12-month old C57/BL6J mice. Paraffin sections were stained with respective antibodies as detailed in Table S2. Magnification bars=600 μm.
